# Supplementary material for: Non-Hermitian non-equipartition theory for trapped particles
Source: Springer Nature journal article supplement (doi:10.1038/s41467-024-46058-5), 2024-03-04
Supplement: 41467_2024_46058_MOESM3_ESM.pdf [file 41467_2024_46058_MOESM3_ESM.pdf]

### **Description of Additional Supplementary Files**

Showcase the trajectories of optically trapped particles under trapping or saddle potentials in a low-vacuum environment, corresponding to each case depicted in Figure 4 of the main text, through movies. Here,  $\eta$  denotes the viscosity,  $\zeta$  characterizes the polarization ( $\hat{\mathbf{p}} = \hat{\mathbf{x}} \cos \zeta + i\hat{\mathbf{y}} \sin \zeta$ ) of the beams, EP denotes the exceptional point, and NP denotes the neutral point.

**Supplementary Movie 1:** Trapping potential;  $\eta = 1.0 \mu\text{Pa}\cdot\text{s}$ ;  $\zeta = 0^\circ\text{-}45^\circ$ .

**Supplementary Movie 2:** Trapping potential;  $\eta = 3.0 \mu\text{Pa}\cdot\text{s}$ ;  $\zeta = 0^\circ\text{-}45^\circ$ .

**Supplementary Movie 3:** Saddle potential;  $\eta = 1.0 \mu\text{Pa}\cdot\text{s}$ ;  $\zeta = 0^\circ\text{-}45^\circ$ .

**Supplementary Movie 4:** Saddle potential;  $\eta = 3.0 \mu\text{Pa}\cdot\text{s}$ ;  $\zeta = 0^\circ\text{-}45^\circ$ .
